# Supplementary material for: A theoretical study on the mechanism of the base-promoted decomposition of N-chloro,N-methylethanolamine
Source: Royal Society of Chemistry journal article supplement (doi:10.1039/b820006h), 2009-01-01
Supplement: b820006h.pdf [file b820006h.pdf]

**Selected parameters mentioned in the text**

Percentage of negative charge transferred from the HO<sup>-</sup>, and degree of evolution for selected bonds at RICs and TSs, using the microsolvated model. Atom labels are the same as in Fig. 2.

| % $q_{\text{transferred}}$          | Hofmann<br>Elim.         |      | Zaitsev<br>Elim. |      | Bimol. Fragm. |      | Intram. Elim. |      |
|-------------------------------------|--------------------------|------|------------------|------|---------------|------|---------------|------|
|                                     | RIC                      | TS   | RIC              | TS   | RIC           | TS   | RIC           | TS   |
|                                     | 21.2                     | 44.1 | 62.4             | 70.9 | 15.1          | 62.4 | 18.1          | 64.3 |
|                                     | % Evolution <sup>a</sup> |      |                  |      |               |      |               |      |
| O <sub>OH</sub> -H <sub>T</sub> (f) | 3.1                      | 34.8 | 1.4              | 58.5 | -             | -    | -             | -    |
| O <sub>OH</sub> -H <sub>O</sub> (f) | -                        | -    | -                | -    | 19.8          | 74.3 | 23.3          | 75.0 |
| O-H <sub>O</sub> (b)                | -                        | -    | -                | -    | 27.6          | 82.8 | 30.8          | 83.3 |
| O-C <sub>3</sub> (f)                | -                        | -    | -                | -    | 4.0           | 29.5 | -             | -    |
| C <sub>3</sub> -C <sub>2</sub> (b)  | -                        | -    | -                | -    | 2.3           | 33.5 | -             | -    |
| O-H <sub>T</sub> (f)                | -                        | -    | -                | -    | -             | -    | 1.4           | 28.2 |
| C <sub>1</sub> -H <sub>T</sub> (b)  | 7.4                      | 42.4 | -                | -    | -             | -    | 4.1           | 38.5 |
| C <sub>2</sub> -H <sub>T</sub> (b)  | -                        | -    | 4.5              | 66.7 | -             | -    | -             | -    |
| C <sub>1</sub> -N (f)               | -1.7                     | 8.8  | -                | -    | -             | -    | -0.8          | 17.0 |
| C <sub>2</sub> -N (f)               | -                        | -    | -2.2             | 0.8  | -2.2          | 23.2 | -             | -    |
| N-Cl (b)                            | 0.7                      | 15.9 | 0.1              | 7.1  | 0.4           | 37.5 | 0.7           | 29.4 |
| <b>S<sub>v</sub></b>                |                          | 0.68 |                  | 0.43 |               | 0.74 |               | 0.68 |

<sup>a</sup> Bonds being formed and broken are labelled **f** and **b**, respectively.

Mulliken atomic charges and dipole moments obtained by using MP2=full/6-31++G(d,p) level. Atom labels are the same as in Fig. 2.

|                                   | C <sub>1</sub> | N     | Cl    | C <sub>2</sub> | C <sub>3</sub> | O     | H <sub>T</sub> | H <sub>O</sub> | O <sub>OH</sub> | H <sub>OH</sub> | O <sub>WO</sub> | H <sub>WO</sub> | O <sub>WN</sub> | H <sub>WN</sub> | μ <sup>a</sup> |
|-----------------------------------|----------------|-------|-------|----------------|----------------|-------|----------------|----------------|-----------------|-----------------|-----------------|-----------------|-----------------|-----------------|----------------|
| <i>Hofmann Elimination</i>        |                |       |       |                |                |       |                |                |                 |                 |                 |                 |                 |                 |                |
| R                                 | -0.15          | -0.31 | -0.11 | -0.09          | 0.02           | -0.59 | 0.14           | 0.39           | -1.21           | 0.21            | -0.72           | 0.36            | -0.72           | 0.36            | -              |
| RIC                               | -0.20          | -0.43 | -0.14 | 0.04           | -0.09          | -0.64 | 0.21           | 0.41           | -1.17           | 0.31            | -0.93           | 0.55            | -0.84           | 0.52            | 10.60          |
| TS                                | -0.42          | -0.33 | -0.31 | -0.02          | -0.05          | -0.64 | 0.41           | 0.43           | -1.03           | 0.31            | -0.86           | 0.52            | -0.88           | 0.54            | 6.16           |
| PIC                               | -0.07          | -0.36 | -0.80 | -0.04          | -0.08          | -0.64 | 0.36           | 0.43           | -0.78           | 0.40            | -0.78           | 0.36            | -0.86           | 0.51            | 8.37           |
| P                                 | -0.04          | -0.27 | -1.00 | -0.19          | 0.07           | -0.58 | 0.36           | 0.38           | -0.72           | 0.36            | -0.72           | 0.36            | -0.72           | 0.36            | -              |
| <i>Zaitsev Elimination</i>        |                |       |       |                |                |       |                |                |                 |                 |                 |                 |                 |                 |                |
| R                                 | -0.15          | -0.31 | -0.11 | -0.09          | 0.02           | -0.59 | 0.13           | 0.39           | -1.21           | 0.21            | -0.72           | 0.36            | -0.72           | 0.36            | -              |
| RIC                               | -0.25          | -0.42 | -0.10 | 0.07           | -0.08          | -0.64 | 0.10           | 0.40           | -1.18           | 0.31            | -0.91           | 0.55            | -0.82           | 0.52            | 10.43          |
| TS                                | -0.21          | -0.32 | -0.23 | -0.55          | -0.03          | -0.65 | 0.50           | 0.40           | -0.86           | 0.32            | -0.80           | 0.48            | -0.83           | 0.52            | 9.80           |
| PIC                               | -0.21          | -0.43 | -0.82 | 0.00           | -0.04          | -0.65 | 0.36           | 0.47           | -0.80           | 0.38            | -0.83           | 0.42            | -0.79           | 0.46            | 11.64          |
| P                                 | -0.24          | -0.26 | -1.00 | -0.07          | 0.01           | -0.57 | 0.36           | 0.36           | -0.72           | 0.36            | -0.72           | 0.36            | -0.72           | 0.36            | -              |
| <i>Bimolecular Fragmentation</i>  |                |       |       |                |                |       |                |                |                 |                 |                 |                 |                 |                 |                |
| R                                 | -0.15          | -0.31 | -0.11 | -0.09          | 0.02           | -0.59 | -              | 0.39           | -1.21           | 0.21            | -0.72           | 0.36            | -0.72           | 0.36            | -              |
| RIC                               | -0.21          | -0.38 | -0.13 | -0.15          | 0.15           | -0.73 | -              | 0.55           | -1.21           | 0.31            | -0.89           | 0.54            | -0.79           | 0.49            | 15.73          |
| TS                                | -0.19          | -0.21 | -0.48 | -0.20          | 0.18           | -0.80 | -              | 0.53           | -0.95           | 0.35            | -0.80           | 0.48            | -0.79           | 0.48            | 15.41          |
| PIC                               | -0.23          | -0.36 | -0.82 | -0.03          | 0.34           | -0.52 | -              | 0.44           | -0.90           | 0.47            | -0.80           | 0.47            | -0.75           | 0.36            | 9.50           |
| P                                 | -0.25          | -0.24 | -1.00 | -0.04          | 0.27           | -0.44 | -              | 0.36           | -0.72           | 0.36            | -0.72           | 0.36            | -0.72           | 0.36            | -              |
| <i>Intramolecular Elimination</i> |                |       |       |                |                |       |                |                |                 |                 |                 |                 |                 |                 |                |
| R                                 | -0.15          | -0.31 | -0.11 | -0.09          | 0.02           | -0.59 | 0.14           | 0.39           | -1.21           | 0.21            | -0.72           | 0.36            | -0.72           | 0.36            | -              |
| RIC                               | -0.21          | -0.39 | -0.14 | 0.08           | -0.13          | -0.72 | 0.16           | 0.57           | -1.21           | 0.33            | -0.84           | 0.52            | -0.79           | 0.51            | 11.78          |
| TS                                | -0.34          | -0.18 | -0.44 | -0.08          | 0.04           | -0.83 | 0.30           | 0.56           | -0.93           | 0.35            | -0.79           | 0.47            | -0.80           | 0.49            | 7.54           |
| PIC                               | 0.00           | -0.33 | -0.85 | -0.22          | 0.07           | -0.68 | 0.41           | 0.51           | -0.87           | 0.36            | -0.79           | 0.45            | -0.77           | 0.34            | 12.34          |
| P                                 | -0.04          | -0.27 | -1.00 | -0.19          | 0.07           | -0.58 | 0.38           | 0.36           | -0.72           | 0.36            | -0.72           | 0.36            | -0.72           | 0.36            | -              |

<sup>a</sup> Debyes

Relevant geometrical parameters of the stationary points (distances in Å and angles in degrees) for the HO<sup>-</sup>-promoted decomposition of (*N*-Cl),*N*-methylethanolamine. Atom labels are the same as in Fig. 2. Superscripts to values refer to the respective parameters, as indicated in left column.

|                                                                                                                                                     | Hofmann Elim.        | Zaitsev Elim.        | Bimol. Fragm.        | Intram. Elim.                          |
|-----------------------------------------------------------------------------------------------------------------------------------------------------|----------------------|----------------------|----------------------|----------------------------------------|
| <b>R</b>                                                                                                                                            |                      |                      |                      |                                        |
| H <sub>T</sub> -C <sub>1</sub> <sup>c</sup> /C <sub>2</sub> <sup>d</sup> /O <sup>e</sup>                                                            | 1.095 <sup>c</sup>   | 1.097 <sup>d</sup>   | -                    | 1.095 <sup>c</sup> /4.783 <sup>c</sup> |
| C <sub>1</sub> -N                                                                                                                                   |                      |                      | 1.465                |                                        |
| N-Cl                                                                                                                                                |                      |                      | 1.761                |                                        |
| N-C <sub>2</sub>                                                                                                                                    |                      |                      | 1.469                |                                        |
| C <sub>2</sub> -C <sub>3</sub>                                                                                                                      |                      |                      | 1.516                |                                        |
| C <sub>3</sub> -O                                                                                                                                   |                      |                      | 1.423                |                                        |
| O-H <sub>O</sub>                                                                                                                                    |                      |                      | 0.970                |                                        |
| <b>RIC</b>                                                                                                                                          |                      |                      |                      |                                        |
| O <sub>OH</sub> -H <sub>T</sub> <sup>a</sup> /H <sub>O</sub> <sup>b</sup>                                                                           | 1.978 <sup>a</sup>   | 2.302 <sup>a</sup>   | 1.511 <sup>b</sup>   | 1.465 <sup>b</sup>                     |
| H <sub>T</sub> -C <sub>1</sub> <sup>c</sup> /C <sub>2</sub> <sup>d</sup> /O <sup>e</sup>                                                            | 1.095 <sup>c</sup>   | 1.092 <sup>d</sup>   | -                    | 1.087 <sup>c</sup> /2.218 <sup>c</sup> |
| C <sub>1</sub> -N                                                                                                                                   | 1.473                | 1.478                | 1.476                | 1.472                                  |
| N-Cl                                                                                                                                                | 1.778                | 1.773                | 1.778                | 1.782                                  |
| N-C <sub>2</sub>                                                                                                                                    | 1.486                | 1.482                | 1.480                | 1.480                                  |
| C <sub>2</sub> -C <sub>3</sub>                                                                                                                      | 1.520                | 1.517                | 1.530                | 1.530                                  |
| C <sub>3</sub> -O                                                                                                                                   | 1.437                | 1.437                | 1.408                | 1.404                                  |
| O-H <sub>O</sub>                                                                                                                                    | 0.970                | 0.970                | 1.036                | 1.051                                  |
| H <sub>WG</sub> -O <sub>OH</sub>                                                                                                                    | 1.452                | 1.063                | 1.518                | 1.599                                  |
| H <sub>WN</sub> -N                                                                                                                                  | 1.772                | 1.770                | 1.864                | 1.877                                  |
| H <sub>O</sub> -O <sub>WN</sub>                                                                                                                     | 2.058                | 2.122                | -                    | -                                      |
| O <sub>OH</sub> -H <sub>T</sub> <sup>a</sup> /H <sub>O</sub> <sup>b</sup> -C <sub>1</sub> <sup>c</sup> /C <sub>2</sub> <sup>d</sup> /O <sup>e</sup> | 152.31 <sup>ac</sup> | 166.07 <sup>ad</sup> | 168.51 <sup>be</sup> | 169.62 <sup>be</sup>                   |
| <b>TS</b>                                                                                                                                           |                      |                      |                      |                                        |
| O <sub>OH</sub> -H <sub>T</sub> <sup>a</sup> /H <sub>O</sub> <sup>b</sup>                                                                           | 1.316 <sup>a</sup>   | 1.108 <sup>a</sup>   | 1.019 <sup>b</sup>   | 1.021 <sup>b</sup>                     |
| H <sub>T</sub> -C <sub>1</sub> <sup>c</sup> /C <sub>2</sub> <sup>d</sup> /O <sup>e</sup>                                                            | 1.296 <sup>c</sup>   | 1.569 <sup>d</sup>   | -                    | 1.264 <sup>c</sup> /1.377 <sup>c</sup> |
| C <sub>1</sub> -N                                                                                                                                   | 1.415                | 1.470                | 1.455                | 1.390                                  |
| N-Cl                                                                                                                                                | 1.967                | 1.866                | 2.126                | 2.048                                  |
| N-C <sub>2</sub>                                                                                                                                    | 1.477                | 1.455                | 1.362                | 1.441                                  |
| C <sub>2</sub> -C <sub>3</sub>                                                                                                                      | 1.525                | 1.492                | 1.804                | 1.561                                  |
| C <sub>3</sub> -O                                                                                                                                   | 1.427                | 1.470                | 1.302                | 1.390                                  |
| O-H <sub>O</sub>                                                                                                                                    | 0.976                | 0.971                | 1.560                | 1.549                                  |
| H <sub>WG</sub> -O <sub>OH</sub>                                                                                                                    | 1.625                | 1.754                | 1.804                | 1.816                                  |
| H <sub>WN</sub> -N                                                                                                                                  | 1.680                | 1.736                | 1.877                | 1.890                                  |
| H <sub>O</sub> -O <sub>WN</sub>                                                                                                                     | 1.928                | 2.255                | -                    | -                                      |
| O <sub>OH</sub> -H <sub>T</sub> <sup>a</sup> /H <sub>O</sub> <sup>b</sup> -C <sub>1</sub> <sup>c</sup> /C <sub>2</sub> <sup>d</sup> /O <sup>e</sup> | 170.29 <sup>ac</sup> | 174.15 <sup>ad</sup> | 175.92 <sup>be</sup> | 176.91 <sup>be</sup>                   |
| <b>PIC</b>                                                                                                                                          |                      |                      |                      |                                        |
| O <sub>OH</sub> -H <sub>T</sub> <sup>a</sup> /H <sub>O</sub> <sup>b</sup>                                                                           | 0.974 <sup>a</sup>   | 0.967 <sup>a</sup>   | 0.972 <sup>b</sup>   | 0.985 <sup>b</sup>                     |
| H <sub>T</sub> -C <sub>1</sub> <sup>c</sup> /C <sub>2</sub> <sup>d</sup> /O <sup>e</sup>                                                            | 3.303 <sup>c</sup>   | 2.511 <sup>d</sup>   | -                    | 3.328 <sup>c</sup> /0.974 <sup>c</sup> |
| C <sub>1</sub> -N                                                                                                                                   | 1.285                | 1.466                | 1.464                | 1.285                                  |
| N-Cl                                                                                                                                                | 4.256                | 3.965                | 4.169                | 4.193                                  |
| N-C <sub>2</sub>                                                                                                                                    | 1.466                | 1.287                | 1.285                | 1.468                                  |
| C <sub>2</sub> -C <sub>3</sub>                                                                                                                      | 1.519                | 1.507                | 3.650                | 1.516                                  |
| C <sub>3</sub> -O                                                                                                                                   | 1.427                | 1.420                | 1.232                | 1.449                                  |
| O-H <sub>O</sub>                                                                                                                                    | 0.974                | 0.981                | 1.995                | 1.736                                  |
| H <sub>WG</sub> -O <sub>OH</sub>                                                                                                                    | 2.850                | 2.319                | 1.827                | 1.882                                  |
| H <sub>WN</sub> -N                                                                                                                                  | 1.757                | 1.963                | 5.137                | 3.716                                  |
| H <sub>O</sub> -O <sub>WN</sub>                                                                                                                     | 1.969                | 6.012                | -                    | -                                      |
| O <sub>OH</sub> -H <sub>T</sub> <sup>a</sup> /H <sub>O</sub> <sup>b</sup> -C <sub>1</sub> <sup>c</sup> /C <sub>2</sub> <sup>d</sup> /O <sup>e</sup> | 88.37 <sup>ac</sup>  | 144.49 <sup>ad</sup> | 168.69 <sup>be</sup> | 174.59 <sup>be</sup>                   |
| <b>P</b>                                                                                                                                            |                      |                      |                      |                                        |
| O <sub>OH</sub> -H <sub>T</sub> <sup>a</sup> /H <sub>O</sub> <sup>b</sup>                                                                           | 0.963 <sup>a</sup>   | 0.963 <sup>a</sup>   | 0.963 <sup>b</sup>   | 0.963 <sup>b</sup>                     |
| H <sub>T</sub> -C <sub>1</sub> <sup>c</sup> /C <sub>2</sub> <sup>d</sup> /O <sup>e</sup>                                                            | -                    | -                    | -                    | 3.570 <sup>c</sup> /0.969 <sup>c</sup> |
| C <sub>1</sub> -N                                                                                                                                   | 1.280                | 1.462                | 1.456                | 1.280                                  |
| N-C <sub>2</sub>                                                                                                                                    | 1.458                | 1.283                | 1.279                | 1.458                                  |
| C <sub>2</sub> -C <sub>3</sub>                                                                                                                      | 1.519                | 1.513                | -                    | 1.519                                  |
| C <sub>3</sub> -O                                                                                                                                   | 1.422                | 1.425                | 1.223                | 1.422                                  |
| O-H <sub>O</sub>                                                                                                                                    | 0.969                | 0.965                | -                    | -                                      |

**Optimized geometries of all structures used in the paper**

All the structures obtained following full geometry optimization (without any geometrical restriction) at MP2=full/6-31++G\*\* computational level, as were used along the paper are appended here. The geometries are specified by Cartesian coordinates, gas phase computed total energies in hartrees (atomic units) are also indicated.

***Common species******(N-Cl),N-methylethanolamine***

|    |              |          |          |
|----|--------------|----------|----------|
| C  | 0.00000      | 0.00000  | 0.00000  |
| N  | 0.00000      | 0.00000  | 1.46490  |
| C  | 1.36422      | 0.00000  | 2.01028  |
| C  | 1.32499      | -0.32634 | 3.49053  |
| O  | 0.64800      | -1.55828 | 3.71107  |
| Cl | -0.83190     | 1.45367  | 2.01017  |
| H  | 0.46161      | -0.93345 | -0.31553 |
| H  | 0.55175      | 0.84579  | -0.42259 |
| H  | -1.02615     | 0.02713  | -0.35389 |
| H  | 1.88124      | -0.80555 | 1.48739  |
| H  | 1.88761      | 0.94517  | 1.81959  |
| H  | 2.33794      | -0.45231 | 3.86767  |
| H  | 0.84943      | 0.48611  | 4.04491  |
| H  | -0.15680     | -1.51617 | 3.17160  |
| E  | -707.9818753 |          |          |

**Water**

|   |             |         |          |
|---|-------------|---------|----------|
| O | 0.00000     | 0.00000 | 0.00000  |
| H | 0.00000     | 0.00000 | 0.96279  |
| H | 0.92826     | 0.00000 | -0.25553 |
| E | -76.2362086 |         |          |

**Hydroxyl ion**

|   |             |         |         |
|---|-------------|---------|---------|
| O | 0.00000     | 0.00000 | 0.00000 |
| H | 0.00000     | 0.00000 | 0.97044 |
| E | -75.6053027 |         |         |

**Chloride ion**

|   |              |  |  |
|---|--------------|--|--|
| E | -459.6814648 |  |  |
|---|--------------|--|--|

***Hofmann Elimination*****RIC**

|    |              |          |          |
|----|--------------|----------|----------|
| C  | 0.00000      | 0.00000  | 0.00000  |
| N  | 0.00000      | 0.00000  | 1.47260  |
| C  | 1.38540      | 0.00000  | 2.01020  |
| C  | 1.90630      | 1.42563  | 2.09217  |
| O  | 1.30782      | 2.16379  | 3.17000  |
| Cl | -0.81783     | -1.48090 | 2.02027  |
| H  | 0.61018      | 0.84131  | -0.34550 |
| H  | -1.02703     | 0.09632  | -0.34780 |
| H  | 0.44467      | -0.91599 | -0.39569 |
| H  | 1.35176      | -0.40851 | 3.01863  |
| H  | 2.04778      | -0.59556 | 1.37535  |
| H  | 2.96997      | 1.36769  | 2.31874  |
| H  | 1.80815      | 1.92776  | 1.12858  |
| H  | 0.39984      | 2.39126  | 2.91426  |
| O  | 2.26850      | 1.60672  | -1.10539 |
| H  | 2.73537      | 2.36991  | -1.47058 |
| H  | 3.14958      | 0.54109  | -0.66181 |
| O  | 3.70070      | -0.29280 | -0.30216 |
| H  | 3.85010      | -0.82941 | -1.08804 |
| H  | -1.07065     | 1.28759  | 2.05198  |
| O  | -1.57203     | 2.05986  | 2.42691  |
| H  | -2.03323     | 1.69968  | 3.19239  |
| E  | -936.1588039 |          |          |

**TS**

|    |              |          |          |
|----|--------------|----------|----------|
| C  | 0.00000      | 0.00000  | 0.00000  |
| N  | 0.00000      | 0.00000  | 1.41507  |
| C  | 1.37390      | 0.00000  | 1.95818  |
| C  | 1.88981      | 1.43160  | 2.05056  |
| O  | 1.34641      | 2.16919  | 3.14473  |
| Cl | -0.76275     | -1.67374 | 2.11247  |
| H  | 0.09864      | -1.20399 | -0.46887 |
| H  | 0.93655      | 0.40120  | -0.38467 |
| H  | -0.87551     | 0.52092  | -0.38677 |
| H  | 1.35691      | -0.40700 | 2.96687  |
| H  | 2.03714      | -0.60872 | 1.33541  |
| H  | 2.96459      | 1.39105  | 2.22875  |
| H  | 1.72198      | 1.95566  | 1.10550  |
| H  | 0.37456      | 2.18640  | 3.05908  |
| O  | 0.40919      | -2.41781 | -0.87200 |
| H  | -0.08430     | -3.01424 | -0.29062 |
| H  | 1.98872      | -2.33111 | -0.50044 |
| O  | 2.97083      | -2.18256 | -0.31629 |
| H  | 3.39046      | -2.33551 | -1.16901 |
| H  | -1.04176     | 1.06265  | 2.19522  |
| O  | -1.48364     | 1.79252  | 2.73136  |
| H  | -1.96308     | 1.32291  | 3.42314  |
| E  | -936.1315274 |          |          |

## PIC

|    |              |          |          |
|----|--------------|----------|----------|
| C  | 0.00000      | 0.00000  | 0.00000  |
| N  | 0.00000      | 0.00000  | 1.28509  |
| C  | 1.31282      | 0.00000  | 1.93753  |
| C  | 1.34664      | 1.02483  | 3.05822  |
| O  | 0.57444      | 0.66088  | 4.20172  |
| Cl | 3.30567      | -0.55023 | -1.33836 |
| H  | 1.48728      | -1.67584 | -2.42654 |
| H  | -0.95417     | -0.00607 | -0.51552 |
| H  | 0.91493      | -0.01368 | -0.58846 |
| H  | 1.47239      | -0.99330 | 2.35877  |
| H  | 2.10919      | 0.19913  | 1.21444  |
| H  | 2.37146      | 1.12128  | 3.41553  |
| H  | 1.03059      | 1.99941  | 2.66966  |
| H  | -0.35972     | 0.58190  | 3.93818  |
| O  | 0.71105      | -2.26310 | -2.45891 |
| H  | 0.80090      | -2.74386 | -1.62273 |
| H  | 2.59916      | -3.55923 | 0.24483  |
| O  | 1.93919      | -2.85877 | 0.19895  |
| H  | 2.43307      | -2.09844 | -0.19349 |
| H  | -1.42557     | 0.04146  | 2.31065  |
| O  | -2.07008     | 0.15185  | 3.06353  |
| H  | -2.38849     | -0.73602 | 3.25921  |
| E  | -936.2588305 |          |          |

## Imine

|   |              |          |          |
|---|--------------|----------|----------|
| C | -0.04943     | 0.00240  | 0.09230  |
| N | 0.03762      | -0.04190 | 1.36837  |
| C | 1.37501      | -0.00371 | 1.94751  |
| C | 1.37886      | 1.03395  | 3.05742  |
| O | 0.43437      | 0.70367  | 4.06835  |
| H | -1.02908     | -0.01230 | -0.36945 |
| H | 0.82239      | 0.05120  | -0.56499 |
| H | 1.57608      | -0.98173 | 2.38712  |
| H | 2.14863      | 0.22209  | 1.20220  |
| H | 2.35217      | 1.06722  | 3.54316  |
| H | 1.16884      | 2.02147  | 2.63387  |
| H | -0.39690     | 0.51201  | 3.60932  |
| E | -247.7870989 |          |          |

*Zaitsev Elimination*

## RIC

|    |              |          |          |
|----|--------------|----------|----------|
| C  | -0.81164     | 0.27228  | -1.46714 |
| N  | -0.89926     | 0.21420  | 0.00686  |
| C  | 0.43266      | 0.07129  | 0.64149  |
| C  | 1.36763      | 1.18408  | 0.20541  |
| O  | 0.80971      | 2.50451  | 0.29904  |
| Cl | -1.83572     | -1.22070 | 0.46083  |
| H  | -0.11181     | -0.46356 | -1.87469 |
| H  | -0.44836     | 1.27282  | -1.69646 |
| H  | -1.81738     | 0.16414  | -1.86682 |
| H  | 0.26219      | 0.11484  | 1.72061  |
| H  | 0.91079      | -0.87931 | 0.39571  |
| H  | 2.26227      | 1.10136  | 0.83024  |
| H  | 1.66828      | 1.01564  | -0.82524 |
| H  | 0.17024      | 2.53659  | 1.02724  |
| O  | 2.38732      | -2.58702 | -0.05469 |
| H  | 1.90241      | -3.39376 | -0.25972 |
| H  | 2.23474      | -1.97192 | -0.90825 |
| O  | 1.88744      | -1.09060 | -2.00616 |
| H  | 2.53019      | -1.19341 | -2.72106 |
| H  | -1.64372     | 1.52399  | 0.93655  |
| O  | -1.84951     | 2.23525  | 1.60301  |
| H  | -2.22935     | 1.76203  | 2.35149  |
| E  | -936.1542446 |          |          |

## TS

|    |              |          |          |
|----|--------------|----------|----------|
| C  | 0.00155      | 0.00837  | -0.00044 |
| N  | -0.00018     | 0.00106  | 1.46972  |
| C  | 1.34113      | 0.00344  | 2.03248  |
| C  | 2.22641      | 1.01689  | 1.38787  |
| O  | 1.72170      | 2.39455  | 1.29862  |
| Cl | -0.84658     | -1.59607 | 1.93465  |
| H  | 0.66599      | -0.75183 | -0.42029 |
| H  | 0.32592      | 1.00177  | -0.30630 |
| H  | -1.01366     | -0.15948 | -0.35092 |
| H  | 1.23686      | 0.22001  | 3.10279  |
| H  | 2.02621      | -1.38453 | 1.77722  |
| H  | 3.15722      | 1.03609  | 1.96154  |
| H  | 2.47996      | 0.76289  | 0.35722  |
| H  | 0.99917      | 2.47554  | 1.94200  |
| O  | 2.45494      | -2.36724 | 1.49823  |
| H  | 1.69995      | -2.96835 | 1.55568  |
| H  | 3.23948      | -2.25549 | -0.06613 |
| O  | 3.66768      | -2.07545 | -0.94075 |
| H  | 3.70946      | -1.11426 | -0.97626 |
| H  | -0.84465     | 1.31787  | 2.22255  |
| O  | -1.10865     | 2.16571  | 2.68170  |
| H  | -1.24217     | 1.90482  | 3.59951  |
| E  | -936.1290373 |          |          |

## PIC

|    |              |          |          |
|----|--------------|----------|----------|
| C  | -0.07544     | 0.62747  | -0.23350 |
| N  | 0.31773      | 0.70623  | 1.17674  |
| C  | 1.57148      | 0.83501  | 1.43559  |
| C  | 2.71067      | 0.91216  | 0.45140  |
| O  | 3.96109      | 0.76658  | 1.10789  |
| Cl | 1.58273      | -2.60364 | -0.60181 |
| H  | 0.37659      | 1.42757  | -0.82376 |
| H  | -1.15676     | 0.71665  | -0.29382 |
| H  | 0.23383      | -0.33696 | -0.64226 |
| H  | 1.86102      | 0.87107  | 2.48533  |
| H  | 0.40067      | -1.25340 | 2.19388  |
| H  | 2.56731      | 0.15099  | -0.32065 |
| H  | 2.71720      | 1.89235  | -0.03353 |
| H  | 3.99077      | -0.16857 | 1.40398  |
| O  | 0.50758      | -2.19993 | 2.35817  |
| H  | 0.68972      | -2.53802 | 1.45549  |
| H  | 2.82185      | -2.05928 | 2.40955  |
| O  | 3.51473      | -1.90822 | 1.74918  |
| H  | 3.07353      | -2.20963 | 0.92171  |
| H  | -1.09126     | 0.41526  | 2.51189  |
| O  | -1.75281     | 0.10237  | 3.16116  |
| H  | -1.60122     | -0.85001 | 3.20237  |
| E  | -936.2665011 |          |          |

## Imine

|   |              |          |          |
|---|--------------|----------|----------|
| C | -0.08654     | 0.63623  | -0.23321 |
| N | 0.31226      | 0.63169  | 1.17345  |
| C | 1.56259      | 0.75271  | 1.43264  |
| C | 2.70204      | 0.89955  | 0.44882  |
| O | 3.97028      | 0.86522  | 1.09864  |
| H | 0.51788      | 1.29394  | -0.86129 |
| H | -1.12255     | 0.95556  | -0.29519 |
| H | -0.02669     | -0.37810 | -0.63176 |
| H | 1.85445      | 0.75532  | 2.48179  |
| H | 2.63533      | 0.13276  | -0.32913 |
| H | 2.65658      | 1.87091  | -0.04418 |
| H | 4.09989      | -0.01525 | 1.47284  |
| E | -247.7688985 |          |          |

***Bimolecular Fragmentation***

## RIC

|    |              |          |          |
|----|--------------|----------|----------|
| C  | 0.83982      | 0.50719  | -0.28913 |
| N  | 0.49289      | 0.03229  | 1.06464  |
| C  | 1.67962      | 0.02184  | 1.94883  |
| C  | 2.12231      | 1.43998  | 2.31645  |
| O  | 3.24471      | 1.36212  | 3.16296  |
| Cl | -0.06065     | -1.64905 | 0.89856  |
| H  | 1.72375      | 0.00430  | -0.68668 |
| H  | 1.04117      | 1.57230  | -0.20011 |
| H  | -0.02385     | 0.37044  | -0.93537 |
| H  | 1.40369      | -0.49084 | 2.86860  |
| H  | 2.51300      | -0.49970 | 1.47403  |
| H  | 1.31061      | 1.95172  | 2.84043  |
| H  | 2.36404      | 2.00608  | 1.41200  |
| H  | 4.01866      | 1.10674  | 2.52266  |
| O  | 4.92601      | 0.69859  | 1.38563  |
| H  | 5.62484      | 1.34133  | 1.21019  |
| H  | 4.40226      | 0.03500  | 0.12454  |
| O  | 4.00130      | -0.47216 | -0.68496 |
| H  | 4.47318      | -1.31169 | -0.68712 |
| H  | -1.06388     | 0.88894  | 1.62634  |
| O  | -1.95799     | 1.23929  | 1.84960  |
| H  | -2.46605     | 0.44780  | 2.05616  |
| E  | -936.1737779 |          |          |

## TS

|    |              |          |          |
|----|--------------|----------|----------|
| C  | 0.00000      | 0.00000  | 0.00000  |
| N  | 0.00000      | 0.00000  | 1.45537  |
| C  | 1.25325      | 0.00000  | 1.98847  |
| C  | 1.99394      | 1.61296  | 1.66465  |
| O  | 3.06967      | 1.70224  | 2.39214  |
| Cl | -0.99685     | -1.83414 | 1.85878  |
| H  | 0.69292      | -0.73344 | -0.42508 |
| H  | 0.30234      | 1.00235  | -0.31895 |
| H  | -1.00498     | -0.19138 | -0.36284 |
| H  | 1.26572      | -0.00516 | 3.07220  |
| H  | 1.99973      | -0.66070 | 1.53924  |
| H  | 1.16219      | 2.28850  | 1.91114  |
| H  | 2.13150      | 1.52507  | 0.57312  |
| H  | 4.27692      | 0.99065  | 1.70770  |
| O  | 5.02015      | 0.47325  | 1.23955  |
| H  | 5.18957      | -0.28783 | 1.80394  |
| H  | 6.38822      | 1.13474  | 0.26796  |
| O  | 7.06281      | 1.41902  | -0.38521 |
| H  | 6.57379      | 1.44944  | -1.21310 |
| H  | -1.45088     | 0.97867  | 2.13259  |
| O  | -2.31648     | 1.34755  | 2.41966  |
| H  | -2.80747     | 0.54987  | 2.64698  |
| E  | -936.1472443 |          |          |

## PIC

|    |              |          |          |
|----|--------------|----------|----------|
| C  | 1.08577      | -0.48921 | -0.67121 |
| N  | 1.93779      | -0.66758 | 0.50561  |
| C  | 1.33120      | -0.97288 | 1.59643  |
| C  | 0.79363      | 2.62648  | 1.87936  |
| O  | 1.96966      | 2.99049  | 1.84471  |
| Cl | -2.02178     | 0.40848  | 1.24400  |
| H  | 0.02226      | -0.53315 | -0.43169 |
| H  | 1.34651      | -1.25313 | -1.40369 |
| H  | 1.31442      | 0.48010  | -1.11314 |
| H  | 1.91983      | -1.09337 | 2.49835  |
| H  | 0.24960      | -1.07253 | 1.66320  |
| H  | 0.03560      | 3.22129  | 2.39877  |
| H  | 0.43667      | 1.71818  | 1.39219  |
| H  | 3.45564      | 1.89927  | 1.08317  |
| O  | 4.04047      | 1.24398  | 0.66683  |
| H  | 3.47608      | 0.44502  | 0.59094  |
| H  | 5.85712      | 1.20295  | 0.86018  |
| O  | 6.83080      | 1.24541  | 0.76736  |
| H  | 6.95163      | 1.57149  | -0.12966 |
| H  | -0.89757     | 0.80354  | 4.52918  |
| O  | -0.31485     | 0.74597  | 3.76502  |
| H  | -0.92742     | 0.60917  | 3.00032  |
| E  | -936.2314099 |          |          |

## Imine

|   |              |          |          |
|---|--------------|----------|----------|
| C | -0.11543     | -0.21895 | -0.14125 |
| N | 0.80971      | 0.41803  | 0.78456  |
| C | 1.40830      | -0.35265 | 1.61126  |
| H | -0.18120     | -1.30434 | -0.00793 |
| H | 0.20386      | -0.00019 | -1.15819 |
| H | -1.10160     | 0.22047  | -0.00568 |
| H | 2.10577      | 0.07648  | 2.31992  |
| H | 1.25381      | -1.43511 | 1.64348  |
| E | -133.5421987 |          |          |

## Formaldehyde

|   |              |         |         |
|---|--------------|---------|---------|
| C | 2.37917      | 2.80292 | 1.70206 |
| O | 3.22790      | 2.23608 | 2.37579 |
| H | 1.43750      | 3.15947 | 2.13973 |
| H | 2.52174      | 2.98695 | 0.62963 |
| E | -114.2008827 |         |         |

*Intramolecular Elimination*

## RIC

|    |              |          |          |
|----|--------------|----------|----------|
| C  | -0.12219     | 0.45150  | -0.27082 |
| N  | 0.35517      | -0.04416 | 1.02988  |
| C  | 1.82859      | 0.03343  | 1.14399  |
| C  | 2.29617      | 1.48241  | 1.29613  |
| O  | 2.19842      | 2.26415  | 0.13364  |
| Cl | -0.09287     | -1.76643 | 1.12998  |
| H  | 0.35034      | -0.07320 | -1.10398 |
| H  | 0.16524      | 1.49857  | -0.31540 |
| H  | -1.20402     | 0.34038  | -0.30751 |
| H  | 2.10019      | -0.50828 | 2.05085  |
| H  | 2.31953      | -0.42818 | 0.28379  |
| H  | 1.71360      | 1.96338  | 2.08793  |
| H  | 3.33614      | 1.41203  | 1.64945  |
| H  | 2.68110      | 1.72029  | -0.62532 |
| O  | 3.29721      | 0.75044  | -1.53441 |
| H  | 3.57278      | 1.11689  | -2.38428 |
| H  | -0.61819     | 0.64813  | 2.47772  |
| O  | -1.19042     | 0.85175  | 3.25355  |
| H  | -1.46751     | -0.01817 | 3.56008  |
| H  | 4.48019      | -0.09402 | -0.86799 |
| O  | 5.21810      | -0.57083 | -0.35550 |
| H  | 5.59423      | 0.13032  | 0.18672  |
| E  | -936.1743736 |          |          |

## TS

|    |              |          |          |
|----|--------------|----------|----------|
| C  | -0.03397     | 0.17140  | -0.15337 |
| N  | 0.25790      | -0.05759 | 1.18581  |
| C  | 1.68536      | -0.06739 | 1.38505  |
| C  | 2.19318      | 1.39313  | 1.16954  |
| O  | 1.87476      | 1.90416  | -0.08343 |
| Cl | -0.37197     | -1.90490 | 1.80568  |
| H  | 0.39494      | -0.54188 | -0.86708 |
| H  | 0.72589      | 1.17228  | -0.28650 |
| H  | -1.08926     | 0.35810  | -0.33541 |
| H  | 1.91572      | -0.37503 | 2.40389  |
| H  | 2.19564      | -0.73227 | 0.67524  |
| H  | 1.77904      | 2.00642  | 1.98167  |
| H  | 3.28187      | 1.33182  | 1.31313  |
| H  | 3.03008      | 1.74343  | -1.10232 |
| O  | 3.82702      | 1.63693  | -1.73170 |
| H  | 4.23309      | 2.50933  | -1.76349 |
| H  | -0.77836     | 0.81533  | 2.50351  |
| O  | -1.36200     | 1.07814  | 3.25058  |
| H  | -1.67921     | 0.22370  | 3.56413  |
| H  | 4.87148      | 0.25215  | -1.19425 |
| O  | 5.37426      | -0.51969 | -0.85490 |
| H  | 4.70857      | -1.05283 | -0.40814 |
| E  | -936.1562176 |          |          |

## PIC

|    |          |          |          |
|----|----------|----------|----------|
| C  | -1.01268 | -0.31945 | 0.02768  |
| N  | 0.06972  | 0.25577  | -0.35887 |
| C  | 1.27039  | -0.07038 | 0.41946  |
| C  | 1.86226  | 1.24558  | 0.88487  |
| O  | 2.04298  | 2.12747  | -0.25014 |
| Cl | -0.37353 | -2.11057 | 3.07410  |
| H  | -1.05066 | -1.01224 | 0.86838  |
| H  | 1.25181  | 1.97580  | -0.79719 |
| H  | -1.92800 | -0.08689 | -0.50905 |
| H  | 1.05856  | -0.72720 | 1.26692  |
| H  | 1.97366  | -0.56106 | -0.25850 |
| H  | 1.20183  | 1.70923  | 1.61553  |
| H  | 2.84684  | 1.10435  | 1.32846  |
| H  | 3.59850  | 2.05941  | -1.01702 |
| O  | 4.51876  | 2.02505  | -1.36722 |
| H  | 4.95269  | 2.80252  | -1.00056 |
| H  | -1.09047 | 1.13275  | 3.83370  |
| O  | -0.24346 | 0.97044  | 3.40543  |
| H  | -0.21399 | -0.01432 | 3.33683  |
| H  | 5.40988  | 0.40128  | -1.03317 |
| O  | 5.87825  | -0.42330 | -0.80603 |
| H  | 5.25505  | -0.92003 | -0.26590 |

E -936.2477836

## Imine

Same species as for Hofmann Elimination
